# Supplementary material for: Repetitive low intensity magnetic field stimulation in a neuronal cell line: a metabolomics study
Source: PeerJ. 2018 Mar 12;6:e4501. doi: 10.7717/peerj.4501 (PMC5853602; doi:10.7717/peerj.4501)
Supplement: Data S1 — Sheet 1: Raw values. Sheet 2: Normalised values. [file peerj-06-4501-s001.xlsx]

## Sheet: Raw values
		C01	C02	C03	C04	C05	C06	C07	C08	C09	C10	C11	C12	C13	C14	C15	C16	C17	C18
12	l-Alanine, N-(trimethylsilyl)-, trimethylsilyl ester	11970847	17168208	7515513	9222247	6947072	8240900	7976085	4619010	8628681	6082463	9720382	9010433	7985749	2328273	13426404	17015542	11357825	12968024	18
14	Glycine, N-(trimethylsilyl)-, trimethylsilyl ester	691443	852298	0	555882	0	853003	0	0	0	0	762340	0	1071702	903719	982962	739157	1126487	1263093	11
21	Carbonic acid, 4-methylphenyl phenyl ester	1729445	1370755	1370900	1672018	1987099	1201716	1459917	1636054	1410005	1743344	1854461	1303626	1443560	1157291	1422664	1291539	1159126	1158943	18
22	L-Valine, N-(trimethylsilyl)-, trimethylsilyl ester	29855525	43810896	7646652	8723850	3403029	5732061	9460086	7134201	7655655	4810821	6407433	3180862	9535560	5295206	7469225	7878278	4105917	5750871	18
24	Serine, bis(trimethylsilyl)-	1738199	1571037	992942	1209900	1289258	638774	3438474	1671964	2739228	2799376	536604	1028140	545727	7056812	4274995	1441378	6716035	6817088	18
28	L-Isoleucine, N-(trimethylsilyl)-, trimethylsilyl ester	27879090	39937956	6043233	7579383	2991396	4497269	7001829	6603176	5180423	3638309	6769951	2795912	8810701	3617261	6639937	6871055	4500109	4268139	18
31	Glycine, N,N-bis(trimethylsilyl)-, trimethylsilyl ester	57256611	57198339	27274102	38311093	25255063	30570196	43482110	45154430	37643844	36521326	38333933	40218472	53351140	45275277	60518296	57991359	48065083	54967171	18
33	Serine tritms	14556302	15142682	848927	4743713	1214890	2828368	4571462	5040861	2898755	2198296	6477546	1560145	8846095	1146532	3927143	8792234	1468780	1978453	18
34	N,O,O-Tris(trimethylsilyl)-L-threonine	68749991	77464118	16868467	32954873	18861406	27604726	38497271	38490248	27187149	26031599	38272839	23128510	56027743	18125794	39792891	53439511	24173673	27244960	18
36	á-Alanine, N,N-bis(trimethylsilyl)-, trimethylsilyl ester	10308556	8386924	8260113	11324725	6952031	9315490	13240479	12700432	12607292	13413386	10579640	13064947	11745394	20321522	17896593	14557691	19855169	20314007	18
41	Butanedioic acid, [(trimethylsilyl)oxy]-, bis(trimethylsilyl) ester	4042238	4449149	3212488	4180125	3175130	4283418	4833314	4629127	4656540	4268824	4160225	5001302	5417428	4907964	6285225	6098291	5908215	6704552	18
44	L-Aspartic acid, N-(trimethylsilyl)-, bis(trimethylsilyl) ester	14672125	17074324	2952950	5050613	1510652	5639818	11762971	8065559	5986657	3897584	8462998	5000816	17129454	3463994	14073544	18866948	6050499	9448136	18
46	L-Proline, 5-oxo-1-(trimethylsilyl)-, trimethylsilyl ester	140306250	155122347	58139980	59205722	33071769	63039565	110508928	91893018	63180324	56641943	57853777	55796245	100635322	75088940	110949250	82515772	93874849	143105463	18
47	Glycyl-l-glutamic acid, bis(trimethylsilyl) ester	89662880	84803132	67617725	75171342	45192012	87466453	121783030	72225644	97937364	93317692	88750779	67402467	116840008	113575845	140468541	137546991	132705526	147091501	18
51	Alanine, phenyl-, trimethylsilyl ester, dl-	15080631	23457765	4404786	3044157	576912	2935231	7628680	2785779	3916045	2616635	2951745	930188	9576004	4459652	7875772	6305236	5993989	8094091	18
63	Phosphoric acid, bis(trimethylsilyl) 2,3-bis[(trimethylsilyl)oxy]propyl ester	19614853	24823744	22289402	13512314	19922927	24703877	26250700	19381863	20246162	17674984	21023175	16781989	23394752	21973069	27248090	27066852	25720963	28745731	18
73	D-Fructose, 1,3,4,5,6-pentakis-O-(trimethylsilyl)-, O-methyloxime	16726561	21580356	4680322	4125312	1381946	1473157	6109484	4833850	3417060	2861156	1992561	2513645	7011538	6309779	8269031	4715900	6380874	7499853	18
74	D-Fructose, 1,3,4,5,6-pentakis-O-(trimethylsilyl)-, O-methyloxime	26588313	24036450	7999810	9440517	18354022	15169144	32189195	24290276	22043291	11029451	24159011	11713238	34653727	7073816	22702348	21418968	10838874	16389894	18
75	d-Glucose, 2,3,4,5,6-pentakis-O-(trimethylsilyl)-, o-methyloxyme, (1E)-	8776672	4199342	1361436	3870848	2301218	2272084	8111434	4651917	5356416	2179962	1618025	1775730	6453681	1015071	4900084	2993407	2374706	3330938	18
77	D-Glucose, 2,3,4,5,6-pentakis-O-(trimethylsilyl)-	4331097	2387495	568374	1346903	0	386847	1307512	599207	763134	449587	562997	400358	427006	435409	903741	804031	610888	1187870	17
95	D-Glucose, 2,3,4,5,6-pentakis-O-(trimethylsilyl)-	22830752	17861315	3637847	6916004	337443	1623924	2522127	1842819	4042357	2299284	1083447	966968	1663792	3223713	2723548	1191421	3425067	4902792	18
101	Inositol, 1,2,3,4,5,6-hexakis-O-(trimethylsilyl)-, scyllo-	11110867	11011426	1195900	3251516	1275722	1212036	3118920	2559633	2758496	2024814	1915149	1338842	3296028	3258044	3804815	2609008	2575360	3007840	18
118	Cholesterol trimethylsilyl ether	62417487	73452132	64804137	55144483	34624031	57266408	59024100	72689902	61060581	60938218	63867239	45378147	63456611	76248779	78720476	67460350	84553838	75888431	18
189	L-Alanine, N-(2,2,3,3,3-pentafluoropropoxy)-, 1-methylethyl ester	0	0	7286379	0	0	0	0	6935840	4904566	7890436	5318554	5542073	6059819	0	0	0	4743575	0	8
297	d-Galactose, 2,3,4,5,6-pentakis-O-(trimethylsilyl)-, o-methyloxyme, (1Z)-	6294866	8935451	2274119	2067640	1718218	2037602	6555304	3563190	3792267	1646510	2661510	923049	5623108	2450312	4414497	2609494	1735441	2854545	18
369	l-Threonine, O-(trimethylsilyl)-, trimethylsilyl ester	0	3028741	10273232	8226746	7204087	6977719	12793710	6264350	11176097	10439527	0	10211385	7818021	26981652	20118141	6018271	24857793	16704931	16
562	l-Leucine, trimethylsilyl ester	0	1645914	1154151	0	0	0	2372064	0	959177	687360	0	0	1251321	2209308	2538022	0	3128068	2494397	10
563	l-Isoleucine, trimethylsilyl ester	930118	2246240	2021516	0	0	0	3853670	1982227	2246271	1819013	0	1278767	1781440	3753623	4132204	1693471	5607592	5606832	14
	Alanine Combined	22279403	25555132	23062005	20546972	13899103	17556390	21216564	24255282	26140539	27386285	25618576	27617453	25790962	22649795	31322997	31573233	35956569	33282031
	Glycine Combined	57948054	58050637	27274102	38866975	25255063	31423199	43482110	45154430	37643844	36521326	39096273	40218472	54422842	46178996	61501258	58730516	49191570	56230264
	Serine Combined	16294501	16713719	1841869	5953613	2504148	3467142	8009936	6712825	5637983	4997672	7014150	2588285	9391822	8203344	8202138	10233612	8184815	8795541
	Isoleucine Combined	28809208	42184196	8064749	7579383	2991396	4497269	10855499	8585403	7426694	5457322	6769951	4074679	10592141	7370884	10772141	8564526	10107701	9874971
	Threonine Combined	68749991	80492859	27141699	41181619	26065493	34582445	51290981	44754598	38363246	36471126	38272839	33339895	63845764	45107446	59911032	59457782	49031466	43949891
	Fructose Combined	43314874	45616806	12680132	13565829	19735968	16642301	38298679	29124126	25460351	13890607	26151572	14226883	41665265	13383595	30971379	26134868	17219748	23889747
	Glucose Combined	35938521	24448152	5567657	12133755	2638661	4282855	11941073	7093943	10161907	4928833	3264469	3143056	8544479	4674193	8527373	4988859	6410661	9421600
	TIC	108894000000	126512000000	69756641400	69574706572	54419765408	65037334543	76560777662	64709283178	69404704892	62758488578	60551332020	52580867264	66091276113	65868968240	70633948189	57952478793	64889360382	68101370608

## Sheet: normalised
	1Hz				10 Hz						Control
	0	0	0	0	1	1	1	1	1	1	2	2	2	2	2	2
Carbonic acid, 4-methylphenyl phenyl ester	0.196526	0.24032	0.365143	0.184773	0.190687	0.252831	0.203157	0.277786	0.306263	0.247928	0.218419	0.175696	0.201414	0.222862	0.178631	0.170179
L-Valine, N-(trimethylsilyl)-, trimethylsilyl ester	1.09619	1.25388	0.62533	0.881349	1.23563	1.1025	1.10305	0.766561	1.05818	0.604947	1.44279	0.8039	1.05746	1.35944	0.632757	0.844457
Butanedioic acid, [(trimethylsilyl)oxy]-, bis(trimethylsilyl) ester	0.460528	0.600811	0.583452	0.658609	0.631304	0.715373	0.670926	0.680199	0.687058	0.951164	0.819689	0.74511	0.889831	1.05229	0.910506	0.984496
L-Aspartic acid, N-(trimethylsilyl)-, bis(trimethylsilyl) ester	0.423322	0.725927	0.277593	0.867166	1.53642	1.24643	0.862572	0.621045	1.39766	0.951071	2.59179	0.525892	1.99246	3.25559	0.932433	1.38736
L-Proline, 5-oxo-1-(trimethylsilyl)-, trimethylsilyl ester	8.33469	8.50966	6.07716	9.69283	14.4341	14.2009	9.10318	9.02538	9.5545	10.6115	15.2267	11.3997	15.7076	14.2385	14.4669	21.0136
Glycyl-l-glutamic acid, bis(trimethylsilyl) ester	9.69337	10.8044	8.30434	13.4487	15.9067	11.1616	14.1111	14.8693	14.6571	12.8188	17.6786	17.2427	19.8868	23.7344	20.451	21.5989
Alanine, phenyl-, trimethylsilyl ester, dl-	0.63145	0.437538	0.106011	0.451315	0.996421	0.430507	0.564233	0.416937	0.487478	0.176906	1.44891	0.677049	1.11501	1.088	0.923724	1.18854
Phosphoric acid, bis(trimethylsilyl) 2,3-bis[(trimethylsilyl)oxy]propyl ester	3.19531	1.94213	3.66097	3.79841	3.42874	2.99522	2.91712	2.81635	3.47196	3.19165	3.53976	3.33588	3.85765	4.67053	3.96382	4.22102
Inositol, 1,2,3,4,5,6-hexakis-O-(trimethylsilyl)-, scyllo-	0.171439	0.467342	0.234423	0.18636	0.407378	0.395559	0.397451	0.322636	0.316285	0.254625	0.498708	0.494625	0.538667	0.450198	0.396885	0.441671
Cholesterol trimethylsilyl ether	9.29003	7.92594	6.3624	8.80516	7.70944	11.2333	8.79776	9.70996	10.5476	8.63016	9.60136	11.5758	11.1449	11.6406	13.0305	11.1435
d-Galactose, 2,3,4,5,6-pentakis-O-(trimethylsilyl)-, o-methyloxyme, (1Z)-	0.326008	0.297183	0.315734	0.313297	0.856222	0.550646	0.546399	0.262357	0.439546	0.175548	0.850809	0.371998	0.624982	0.450282	0.267446	0.419161
Alanine Combined	3.30607	2.95322	2.55405	2.69943	2.77121	3.74835	3.76639	4.36376	4.23089	5.25238	3.90232	3.43861	4.43455	5.44812	5.54121	4.88713
Glycine Combined	3.90989	5.58637	4.64079	4.83156	5.67942	6.97805	5.42382	5.81934	6.45672	7.64888	8.2345	7.01074	8.70704	10.1343	7.58084	8.25685
Serine Combined	0.264042	0.855715	0.460154	0.5331	1.04622	1.03738	0.812334	0.796334	1.15838	0.492248	1.42104	1.2454	1.16122	1.76586	1.26135	1.29154
Isoleucine Combined	1.15613	1.08939	0.549689	0.69149	1.41789	1.32677	1.07006	0.869575	1.11805	0.774936	1.60265	1.11902	1.52507	1.47785	1.55768	1.45004
Threonine Combined	3.89091	5.91905	4.78971	5.31732	6.69938	6.91626	5.52747	5.81135	6.32073	6.34069	9.66024	6.84806	8.4819	10.2597	7.55616	6.4536
Fructose Combined	1.81777	1.94982	3.62662	2.55888	5.00239	4.50076	3.66839	2.21334	4.31891	2.70571	6.3042	2.03185	4.38477	4.50971	2.65371	3.50797
Glucose Combined	0.798154	1.74399	0.484872	0.658523	1.55969	1.09628	1.46415	0.785365	0.539124	0.597757	1.29283	0.70962	1.20726	0.860853	0.987937	1.38347
	1 Hz	10 Hz	Control
Butanedioic acid, [(trimethylsilyl)oxy]-, bis(trimethylsilyl) ester	0.57585	0.72267	0.900321		0.0833248
L-Aspartic acid, N-(trimethylsilyl)-, bis(trimethylsilyl) ester	0.573502	1.10253	1.78092		0.270548
L-Proline, 5-oxo-1-(trimethylsilyl)-, trimethylsilyl ester	8.15358	11.1549	15.3422		1.51001
Glycyl-l-glutamic acid, bis(trimethylsilyl) ester	10.5627	13.9208	20.0988		2.17892
Alanine, phenyl-, trimethylsilyl ester, dl-	0.406579	0.512081	1.07354		0.218988
Phosphoric acid, bis(trimethylsilyl) 2,3-bis[(trimethylsilyl)oxy]propyl ester	3.14921	3.13684	3.93144		0.845091
Inositol, 1,2,3,4,5,6-hexakis-O-(trimethylsilyl)-, scyllo-	0.264891	0.348989	0.470126		0.137617
Cholesterol trimethylsilyl ether	8.09588	9.43804	11.3561		1.2862
Alanine Combined	2.87819	4.02216	4.60866		0.329508
Glycine Combined	4.74215	6.33437	8.3207		0.688869
Serine Combined	0.528253	0.890483	1.35773		0.246103
Isoleucine Combined	0.871673	1.09621	1.45539		0.296902
Threonine Combined	4.97925	6.26931	8.20995		0.85983
Carbonic acid, 4-methylphenyl phenyl ester	0.246691	0.246442	0.194533		0.0825061
L-Valine, N-(trimethylsilyl)-, trimethylsilyl ester	0.964188	0.978478	1.02347		0.272663
d-Galactose, 2,3,4,5,6-pentakis-O-(trimethylsilyl)-, o-methyloxyme, (1Z)-	0.313055	0.471786	0.497446		0.0119294
Fructose Combined	2.48827	3.73492	3.8987		0.824686
Glucose Combined	0.921385	1.00706	1.07366		0.563177
	Control/1	Control/10	10 Hz/1 Hz
Butanedioic acid, [(trimethylsilyl)oxy]-, bis(trimethylsilyl) ester	0.639605	0.802681	0.796836
L-Aspartic acid, N-(trimethylsilyl)-, bis(trimethylsilyl) ester	0.322025	0.61908	0.520167
L-Proline, 5-oxo-1-(trimethylsilyl)-, trimethylsilyl ester	0.531449	0.727076	0.73094
Glycyl-l-glutamic acid, bis(trimethylsilyl) ester	0.52554	0.692618	0.758772
Alanine, phenyl-, trimethylsilyl ester, dl-	0.378728	0.477003	0.793974
Phosphoric acid, bis(trimethylsilyl) 2,3-bis[(trimethylsilyl)oxy]propyl ester	0.801031	0.797885	1.00394
Inositol, 1,2,3,4,5,6-hexakis-O-(trimethylsilyl)-, scyllo-	0.563447	0.742332	0.759023
Cholesterol trimethylsilyl ether	0.712911	0.831099	0.857793
Alanine Combined	0.624519	0.87274	0.715584
Glycine Combined	0.569922	0.761278	0.748638
Serine Combined	0.389069	0.65586	0.593221
Isoleucine Combined	0.598929	0.753211	0.795168
Threonine Combined	0.606489	0.763623	0.794226
Carbonic acid, 4-methylphenyl phenyl ester	1.26811	1.26684	1.00101
L-Valine, N-(trimethylsilyl)-, trimethylsilyl ester	0.942081	0.956044	0.985396
d-Galactose, 2,3,4,5,6-pentakis-O-(trimethylsilyl)-, o-methyloxyme, (1Z)-	0.629325	0.948416	0.663553
Fructose Combined	0.638231	0.95799	0.666219
Glucose Combined	0.85817	0.937968	0.914925
